# Supplementary material for: Dietary Tyrosine Intake (FFQ) Is Associated with Locus Coeruleus, Attention and Grey Matter Maintenance: An MRI Structural Study on 398 Healthy Individuals of the Berlin Aging Study-II
Source: Springer Nature journal article supplement (doi:10.1007/s12603-023-2005-y), 2023-10-20
Supplement: MOESM2 [file 12603_2023_2005_MOESM2_ESM.pdf]

## Statistical analysis: Design orthogonality

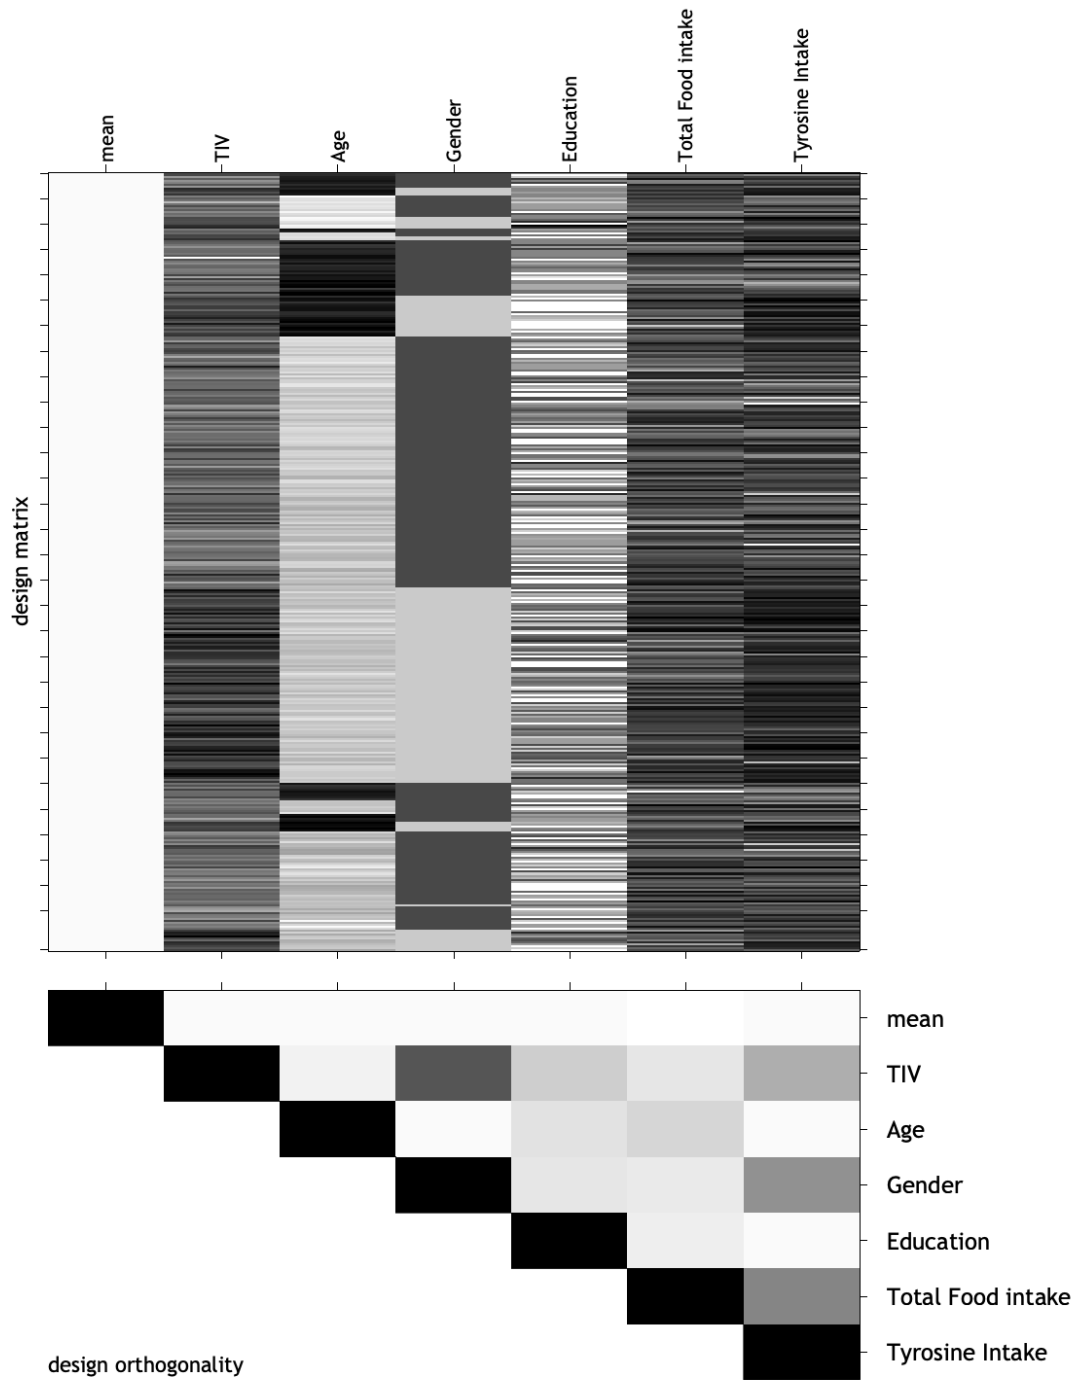

Measure : abs. value of cosine of angle between columns of design matrix  
 Scale : black - colinear (cos=+1/-1)  
 white - orthogonal (cos=0)  
 gray - not orthogonal or colinear

1 (masked [incl.] by LC\_omnimask\_1mm\_sym\_last\_last.nii)

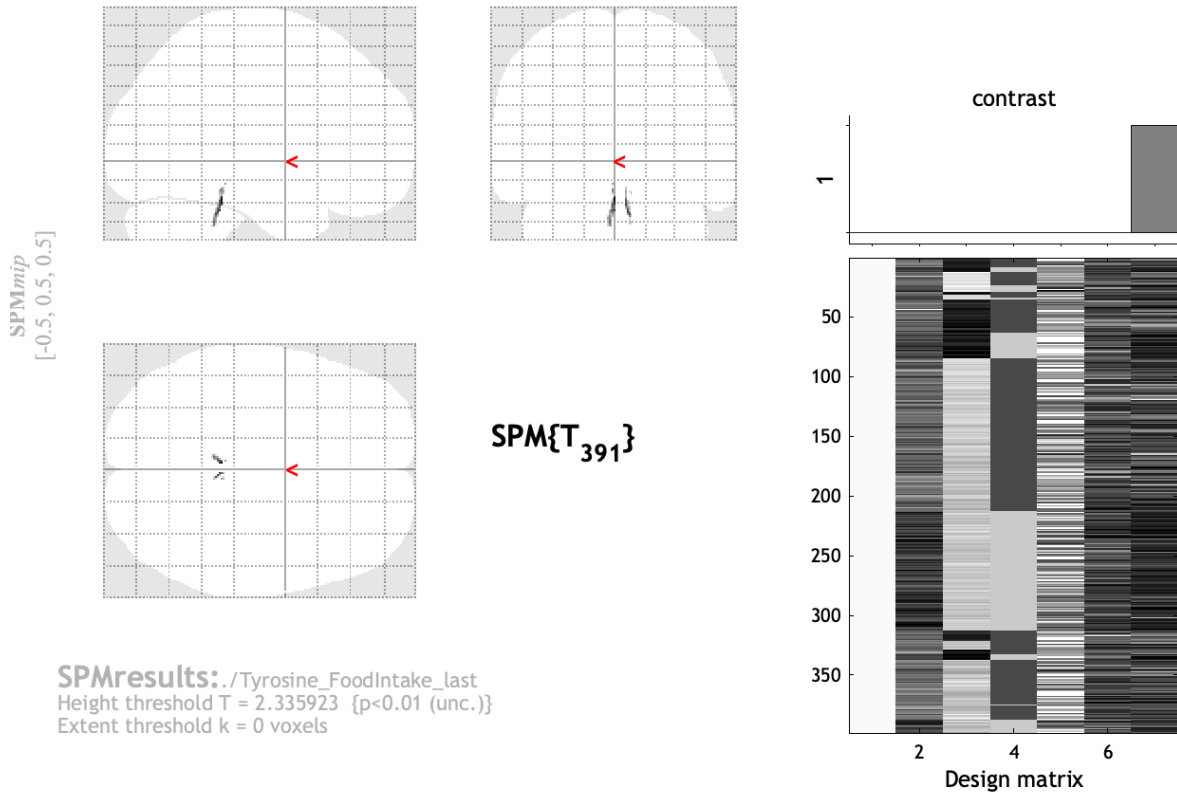

SPMresults: ./Tyrosine\_FoodIntake\_last  
Height threshold T = 2.335923 {p<0.01 (unc.)}  
Extent threshold k = 0 voxels

Statistics: p-values adjusted for search volume

| set-level |   | cluster-level         |                       |                | peak-level          |                       |                       |      |                   | mm mm mm            |    |     |     |
|-----------|---|-----------------------|-----------------------|----------------|---------------------|-----------------------|-----------------------|------|-------------------|---------------------|----|-----|-----|
| p         | c | p <sub>FWE-corr</sub> | q <sub>FDR-corr</sub> | k <sub>E</sub> | p <sub>uncorr</sub> | p <sub>FWE-corr</sub> | q <sub>FDR-corr</sub> | T    | (Z <sub>E</sub> ) | p <sub>uncorr</sub> |    |     |     |
| 1.000     | 5 | 0.999                 | 0.119                 | 79             | 0.003               | 0.633                 | 0.593                 | 5.02 | 4.93              | 0.000               | -2 | -36 | -22 |
|           |   |                       |                       |                |                     | 1.000                 | 0.999                 | 3.64 | 3.61              | 0.000               | -4 | -40 | -34 |
|           |   | 1.000                 | 0.441                 | 42             | 0.021               | 1.000                 | 0.999                 | 4.18 | 4.13              | 0.000               | 4  | -38 | -24 |
|           |   | 1.000                 | 0.727                 | 1              | 0.727               | 1.000                 | 0.999                 | 3.16 | 3.14              | 0.001               | -2 | -34 | -14 |
|           |   | 1.000                 | 0.727                 | 4              | 0.448               | 1.000                 | 0.999                 | 3.07 | 3.05              | 0.001               | 6  | -36 | -18 |
|           |   | 1.000                 | 0.727                 | 3              | 0.516               | 1.000                 | 0.999                 | 2.72 | 2.71              | 0.003               | 6  | -40 | -34 |

table shows 3 local maxima more than 8.0mm apart

Height threshold: T = 2.34, p = 0.010 (1.000)  
Extent threshold: k = 0 voxels  
Expected voxels per cluster, <k> = 7.399  
Expected number of clusters, <c> = 2524.24  
FWEp: 5.535, FDRp: Inf, FWEc: 209, FDRc: 111

Degrees of freedom = [1.0, 391.0]  
FWHM = 3.0 3.0 2.9 mm mm mm; 3.0 3.0 2.9 {voxels}  
Volume: 1752559 = 1752559 voxels = 63448.9 resels  
Voxel size: 1.0 1.0 1.0 mm mm mm; (resel = 25.77 voxels)

1 (masked [incl.] by LC\_omnimask\_1mm\_sym\_last\_last.nii)

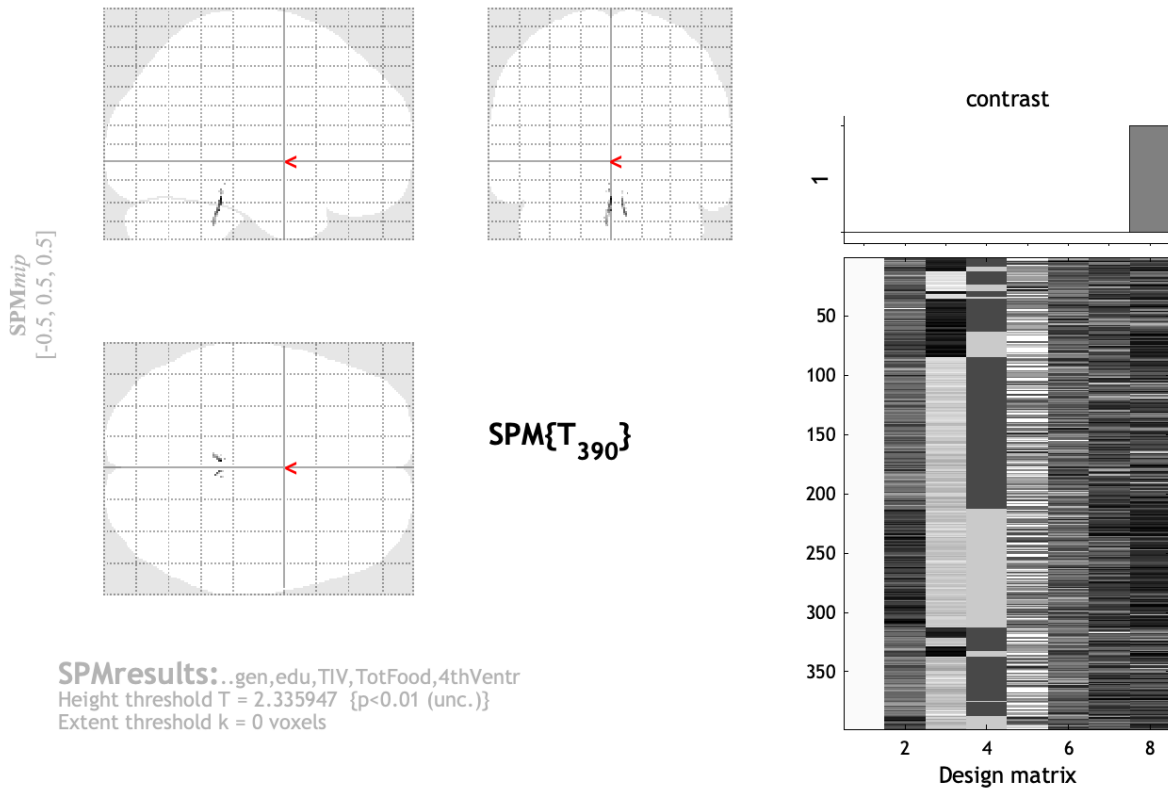

SPMresults: ..gen,edu,TIV,TotFood,4thVentr  
Height threshold T = 2.335947 {p<0.01 (unc.)}  
Extent threshold k = 0 voxels

Statistics: p-values adjusted for search volume

| set-level |   | cluster-level         |                       |                |                     | peak-level            |                       |      |                   |                     | mm mm mm |     |     |
|-----------|---|-----------------------|-----------------------|----------------|---------------------|-----------------------|-----------------------|------|-------------------|---------------------|----------|-----|-----|
| p         | c | p <sub>FWE-corr</sub> | q <sub>FDR-corr</sub> | k <sub>E</sub> | p <sub>uncorr</sub> | p <sub>FWE-corr</sub> | q <sub>FDR-corr</sub> | T    | (Z <sub>E</sub> ) | p <sub>uncorr</sub> |          |     |     |
| 1.000     | 7 | 1.000                 | 0.361                 | 48             | 0.015               | 0.969                 | 1.000                 | 4.72 | 4.65              | 0.000               | -2       | -36 | -22 |
|           |   | 1.000                 | 0.727                 | 20             | 0.095               | 1.000                 | 1.000                 | 3.20 | 3.18              | 0.001               | -4       | -40 | -34 |
|           |   | 1.000                 | 0.727                 | 4              | 0.447               | 1.000                 | 1.000                 | 3.85 | 3.81              | 0.000               | 4        | -38 | -24 |
|           |   | 1.000                 | 0.727                 | 2              | 0.602               | 1.000                 | 1.000                 | 3.20 | 3.18              | 0.001               | -2       | -36 | -16 |
|           |   | 1.000                 | 0.727                 | 2              | 0.602               | 1.000                 | 1.000                 | 3.03 | 3.01              | 0.001               | 6        | -36 | -18 |
|           |   | 1.000                 | 0.727                 | 1              | 0.727               | 1.000                 | 1.000                 | 2.92 | 2.91              | 0.002               | -2       | -34 | -14 |
|           |   | 1.000                 | 0.727                 | 2              | 0.602               | 1.000                 | 1.000                 | 2.56 | 2.55              | 0.005               | 4        | -36 | -18 |
|           |   | 1.000                 | 0.727                 | 1              | 0.727               | 1.000                 | 1.000                 | 2.42 | 2.41              | 0.008               | -4       | -36 | -18 |

table shows 3 local maxima more than 8.0mm apart

Height threshold: T = 2.34, p = 0.010 (1.000)  
Extent threshold: k = 0 voxels  
Expected voxels per cluster, <k> = 7.370  
Expected number of clusters, <c> = 2534.02  
FWEp: 5.536, FDRp: Inf, FWEc: 207, FDRc: 109

Degrees of freedom = [1.0, 390.0]  
FWHM = 3.0 3.0 2.9 mm mm mm; 3.0 3.0 2.9 {voxels}  
Volume: 1752559 = 1752559 voxels = 63700.2 resels  
Voxel size: 1.0 1.0 1.0 mm mm mm; (resel = 25.67 voxels)

LC-Tyrosine Time Point 2 results

1 (masked [incl.] by LC\_omnimask\_1mm\_sym\_last\_last.nii)

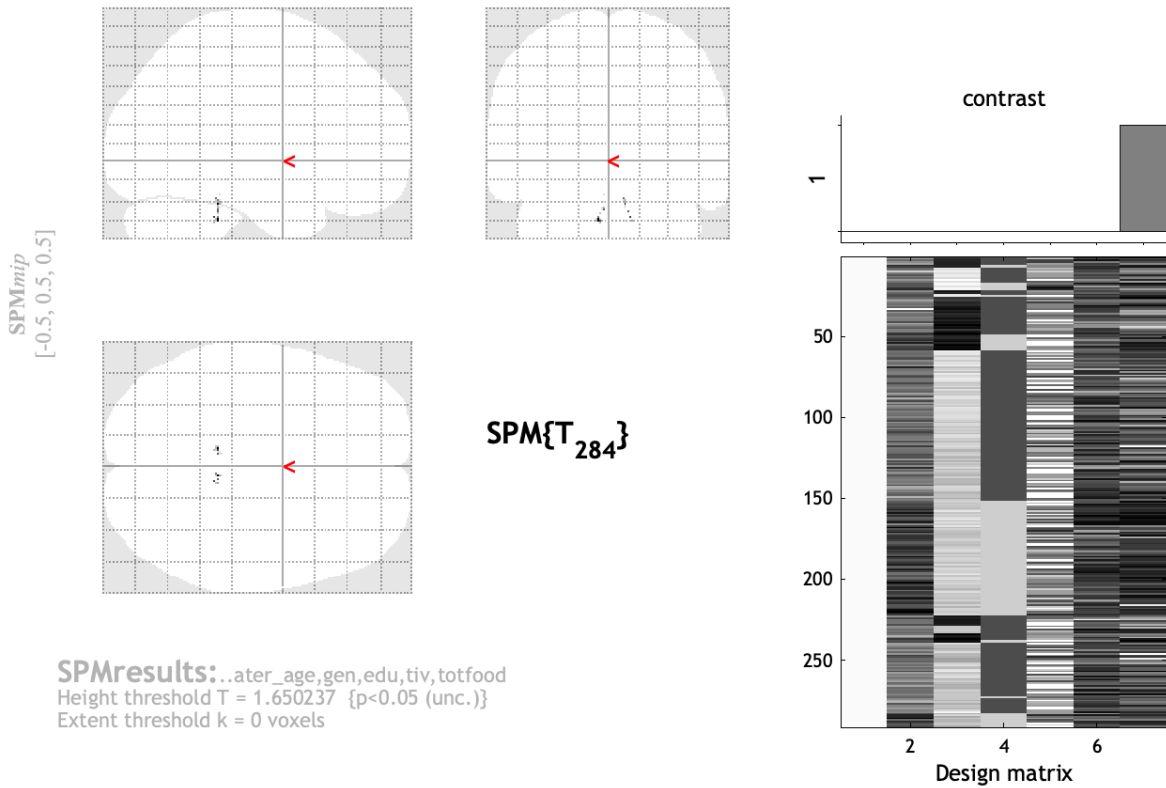

SPMresults: ..ater\_age,gen,edu,tiv,totfood  
Height threshold T = 1.650237 {p<0.05 (unc.)}  
Extent threshold k = 0 voxels

Statistics: p-values adjusted for search volume

| set-level |   | cluster-level         |                       |                |                     | peak-level            |                       |      |                   |                     | mm mm mm |     |     |
|-----------|---|-----------------------|-----------------------|----------------|---------------------|-----------------------|-----------------------|------|-------------------|---------------------|----------|-----|-----|
| p         | c | p <sub>FWE-corr</sub> | q <sub>FDR-corr</sub> | k <sub>E</sub> | p <sub>uncorr</sub> | p <sub>FWE-corr</sub> | q <sub>FDR-corr</sub> | T    | (Z <sub>E</sub> ) | p <sub>uncorr</sub> |          |     |     |
| 1.000     | 9 | 1.000                 | 0.879                 | 12             | 0.508               | 1.000                 | 1.001                 | 2.53 | 2.52              | 0.006               | -8       | -38 | -34 |
|           |   | 1.000                 | 0.879                 | 12             | 0.508               | 1.000                 | 1.001                 | 2.50 | 2.49              | 0.006               | 6        | -38 | -24 |
|           |   | 1.000                 | 0.879                 | 1              | 0.879               | 1.000                 | 1.001                 | 2.26 | 2.25              | 0.012               | 10       | -40 | -32 |
|           |   | 1.000                 | 0.879                 | 1              | 0.879               | 1.000                 | 1.001                 | 2.17 | 2.17              | 0.015               | 8        | -38 | -28 |
|           |   | 1.000                 | 0.879                 | 4              | 0.722               | 1.000                 | 1.001                 | 2.15 | 2.14              | 0.016               | -4       | -38 | -28 |
|           |   | 1.000                 | 0.879                 | 2              | 0.814               | 1.000                 | 1.001                 | 1.93 | 1.93              | 0.027               | 10       | -38 | -34 |
|           |   | 1.000                 | 0.879                 | 1              | 0.879               | 1.000                 | 1.001                 | 1.81 | 1.81              | 0.035               | -6       | -38 | -30 |
|           |   | 1.000                 | 0.879                 | 1              | 0.879               | 1.000                 | 1.001                 | 1.69 | 1.70              | 0.045               | -4       | -36 | -20 |
|           |   | 1.000                 | 0.879                 | 1              | 0.879               | 1.000                 | 1.001                 | 1.69 | 1.70              | 0.045               | -4       | -36 | -24 |

table shows 3 local maxima more than 8.0mm apart

Height threshold: T = 1.65, p = 0.049 (1.000)  
Extent threshold: k = 0 voxels  
Expected voxels per cluster, <k> = 28.565  
Expected number of clusters, <c> = 3524.12  
FWEp: 5.576, FDRp: Inf, FWEc: 820, FDRc: 458

Degrees of freedom = [1.0, 284.0]  
FWHM = 3.1 3.1 3.0 mm mm mm; 3.1 3.1 3.0 {voxels}  
Volume: 1742097 = 1742097 voxels = 54879.5 resels  
Voxel size: 1.0 1.0 1.0 mm mm mm; (resel = 29.67 voxels)

-1 (masked [incl.] by LC\_omnimask\_1mm\_sym\_last\_last.nii)

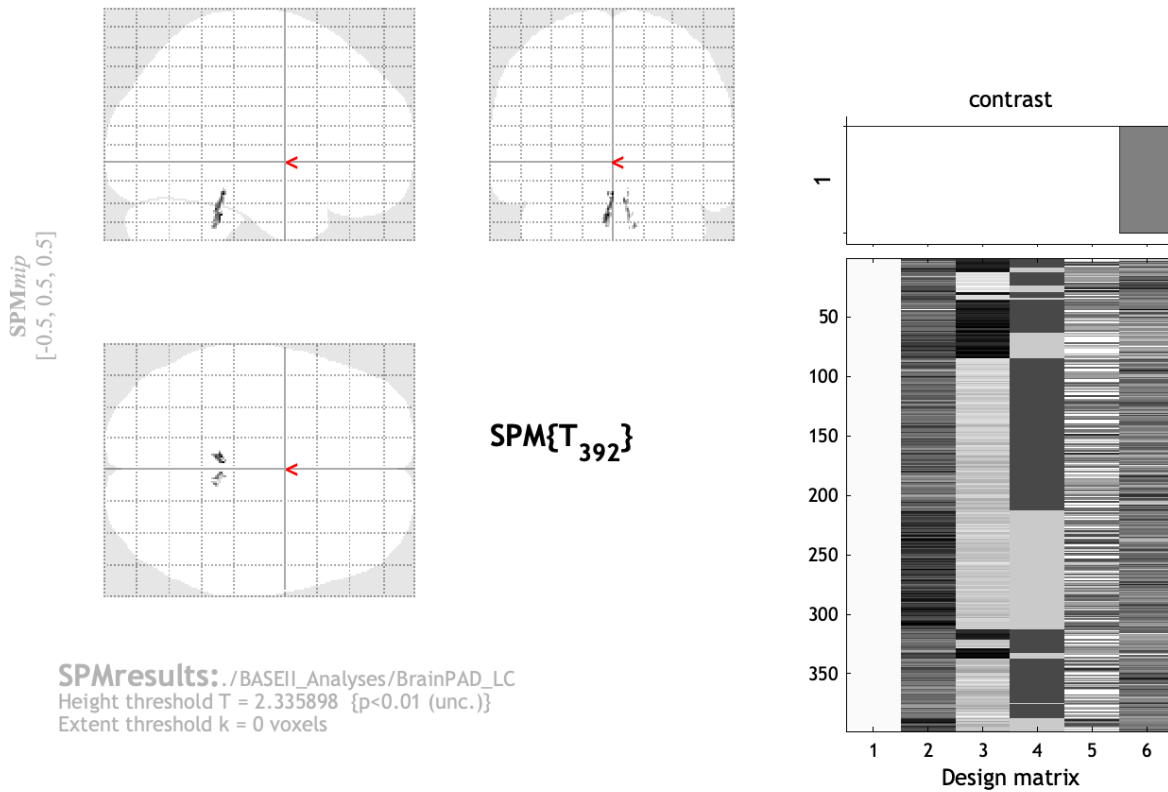

**Statistics: p-values adjusted for search volume**

| set-level |     | cluster-level  |                |       |              | peak-level     |                |      |         |              | mm mm mm |     |     |
|-----------|-----|----------------|----------------|-------|--------------|----------------|----------------|------|---------|--------------|----------|-----|-----|
| $p$       | $c$ | $P_{FWE-corr}$ | $q_{FDR-corr}$ | $k_E$ | $P_{uncorr}$ | $P_{FWE-corr}$ | $q_{FDR-corr}$ | $T$  | $(Z_E)$ | $P_{uncorr}$ |          |     |     |
| 1.000     | 6   | 0.575          | 0.013          | 125   | 0.000        | 0.998          | 0.015          | 4.56 | 4.50    | 0.000        | -2       | -36 | -18 |
|           |     |                |                |       |              | 0.999          | 0.016          | 4.54 | 4.48    | 0.000        | -4       | -36 | -30 |
|           |     | 1.000          | 0.212          | 51    | 0.012        | 1.000          | 0.118          | 3.78 | 3.74    | 0.000        | 4        | -36 | -22 |
|           |     |                |                |       |              | 1.000          | 0.210          | 3.50 | 3.47    | 0.000        | 6        | -40 | -30 |
|           |     | 1.000          | 0.726          | 16    | 0.131        | 1.000          | 0.229          | 3.46 | 3.43    | 0.000        | 10       | -40 | -34 |
|           |     | 1.000          | 0.726          | 3     | 0.514        | 1.000          | 0.483          | 3.02 | 3.00    | 0.001        | 6        | -40 | -36 |
|           |     | 1.000          | 0.726          | 5     | 0.392        | 1.000          | 0.490          | 3.01 | 2.99    | 0.001        | 6        | -34 | -18 |
|           |     | 1.000          | 0.726          | 1     | 0.726        | 1.000          | 0.912          | 2.45 | 2.44    | 0.007        | 6        | -36 | -16 |

table shows 3 local maxima more than 8.0mm apart

Height threshold:  $T = 2.34$ ,  $p = 0.010$  (1.000)  
 Extent threshold:  $k = 0$  voxels  
 Expected voxels per cluster,  $\langle k \rangle = 7.347$   
 Expected number of clusters,  $\langle c \rangle = 2541.57$   
 FWEp: 5.535, FDRp: 4.136, FWEc: 203, FDRc: 90

Degrees of freedom = [1.0, 392.0]  
 FWHM = 3.0 3.0 2.9 mm mm mm; 3.0 3.0 2.9 {voxels}  
 Volume: 1752559 = 1752559 voxels = 63898.8 resels  
 Voxel size: 1.0 1.0 1.0 mm mm mm; (resel = 25.59 voxels)
